# Supplementary material for: A Non-VH1-69 Heterosubtypic Neutralizing Human Monoclonal Antibody Protects Mice against H1N1 and H5N1 Viruses
Source: PubMed Central journal article supplement (PMC3319592; doi:10.1371/journal.pone.0034415), 2012-04-04

**A****A/Wilson Smith/1933**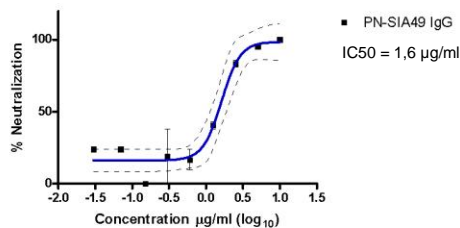**A/Puerto Rico/8/1934**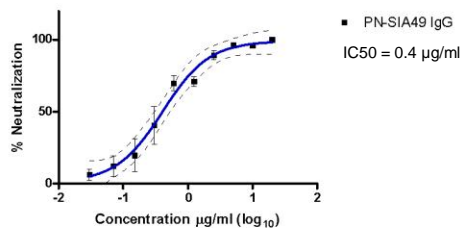**A/Malaya/302/1954**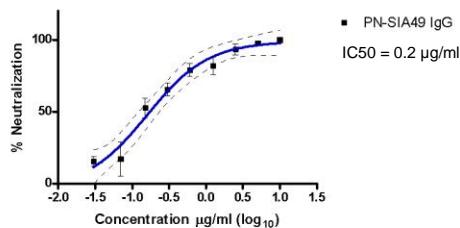**A/Milan/UHSR1/2009**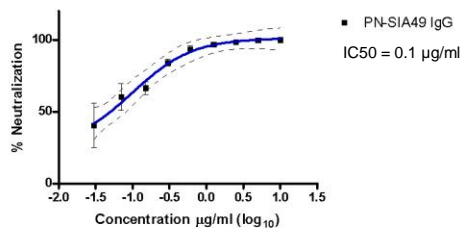**A/swine/Parma/1/1997**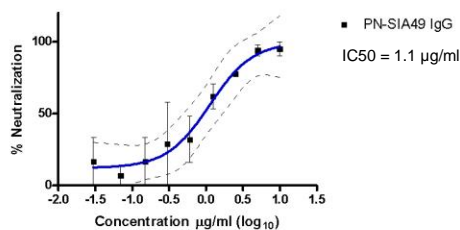**B****A/Puerto Rico/8/1934**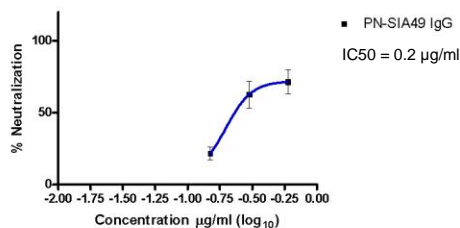**A/Milan/UHSR1/2009**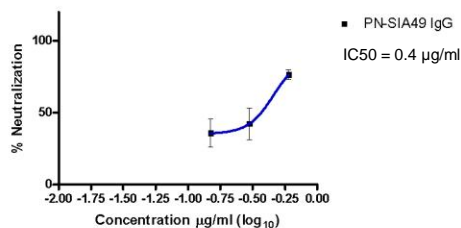**C****A/Wilson Smith/1933**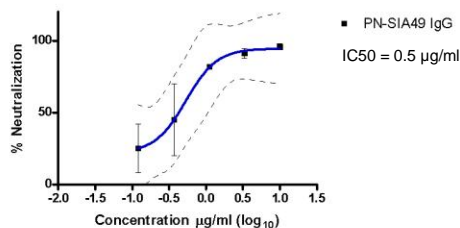**A/Ann Arbor/6/1960**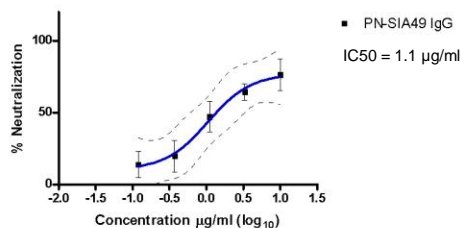**A/Vietnam/1203/2004 clade 1**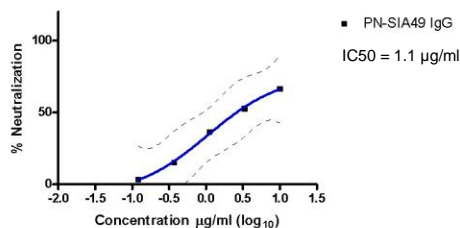**A/duck/Vietnam/NCVD98/2007 clade 2.3.4**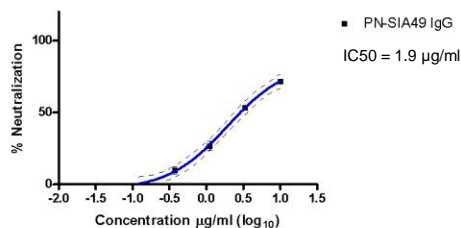

Supplement: pone.0034415.s001.pdf [file pone.0034415.s001.pdf]
