# Supplementary material for: A Non-VH1-69 Heterosubtypic Neutralizing Human Monoclonal Antibody Protects Mice against H1N1 and H5N1 Viruses
Source: PubMed Central journal article supplement (PMC3319592; doi:10.1371/journal.pone.0034415), 2012-04-04

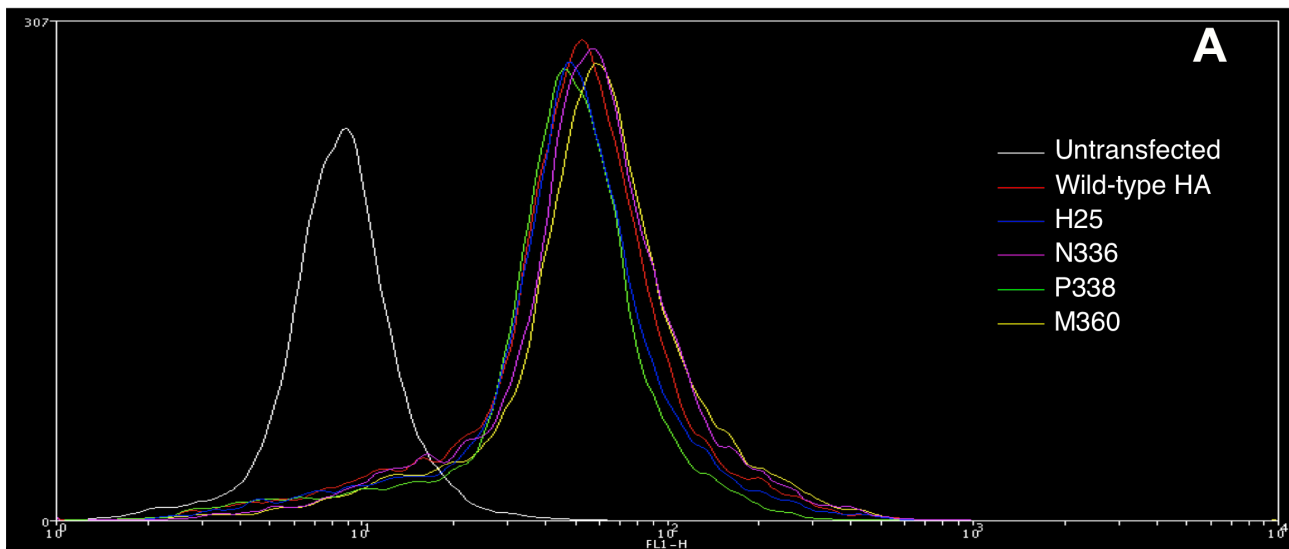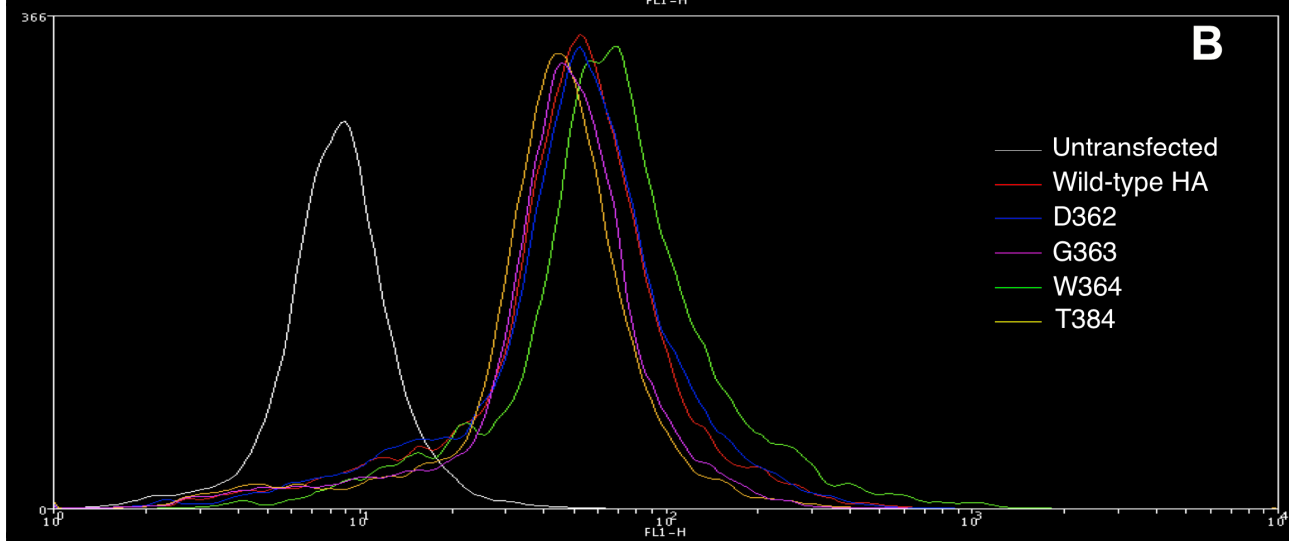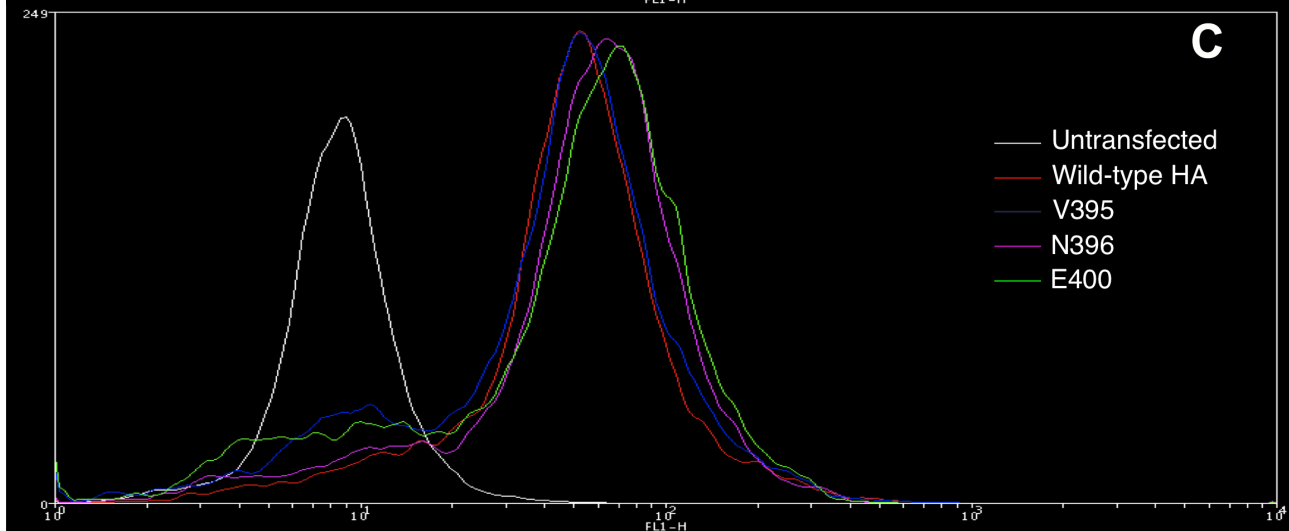

Supplement: pone.0034415.s004.pdf [file pone.0034415.s004.pdf]
